# Supplementary material for: Analysis of long non-coding RNAs in neonatal piglets at different stages of porcine deltacoronavirus infection
Source: BMC Vet Res. 2019 Apr 11;15:111. doi: 10.1186/s12917-019-1862-4 (PMC6458635; doi:10.1186/s12917-019-1862-4)
Supplement: Supplementary file 2 — Gene ontology (GO) analysis of target genes. (XLSX 10 kb) [file 12917_2019_1862_MOESM2_ESM.xlsx]

## Sheet: Sheet1
Catergory	GO_Term	Cluster frequency	Genome frequency of use	Corrected P-value	Genes annotated to the term
Early stage
molecular_function	GO:0000293 ferric-chelate reductase activity	2 out of 45 genes, 4.4%	2 out of 13835 genes, 0.0%	0.0009	gene19110,gene24221
molecular_function	GO:0016723 oxidoreductase activity, oxidizing metal ions, NAD or NADP as acceptor	2 out of 45 genes, 4.4%	7 out of 13835 genes, 0.1%	0.0187	gene19110,gene24221
molecular_function	GO:0016722 oxidoreductase activity, oxidizing metal ions	2 out of 45 genes, 4.4%	10 out of 13835 genes, 0.1%	0.03983	gene19110,gene24221
cellular_component	GO:0031362 anchored component of external side of plasma membrane	2 out of 45 genes, 4.4%	10 out of 13835 genes, 0.1%	0.04853	gene19943,gene16639
cellular_component	GO:0031233 intrinsic component of external side of plasma membrane	2 out of 45 genes, 4.4%	11 out of 13835 genes, 0.1%	0.05919	gene19943,gene16639
cellular_component	GO:0046658 anchored component of plasma membrane	2 out of 45 genes, 4.4%	23 out of 13835 genes, 0.2%	0.26563	gene19943,gene16639
biological_process	GO:0043277 apoptotic cell clearance	2 out of 45 genes, 4.4%	15 out of 13835 genes, 0.1%	0.3447	gene19961,gene22343
Middle stage
molecular_function	GO:0004659 prenyltransferase activity	2 out of 27 genes, 7.4%	12 out of 13835 genes, 0.1%	0.01793	gene20121,gene25517
biological_process	GO:0042104 positive regulation of activated T cell proliferation	2 out of 27 genes, 7.4%	14 out of 13835 genes, 0.1%	0.11382	gene9840,gene2535
molecular_function	GO:0016765 transferase activity, transferring alkyl or aryl (other than methyl) groups	2 out of 27 genes, 7.4%	40 out of 13835 genes, 0.3%	0.20497	gene20121,gene25517
molecular_function	GO:0016491 oxidoreductase activity	5 out of 27 genes, 18.5%	557 out of 13835 genes, 4.0%	0.30138	gene20160,gene6336,gene20121,gene23442,gene24221
biological_process	GO:0007140 male meiosis	2 out of 27 genes, 7.4%	24 out of 13835 genes, 0.2%	0.3411	gene19568,gene6336
biological_process	GO:0046006 regulation of activated T cell proliferation	2 out of 27 genes, 7.4%	26 out of 13835 genes, 0.2%	0.40069	gene9840,gene2535
molecular_function	GO:0003824 catalytic activity	15 out of 27 genes, 55.6%	4243 out of 13835 genes, 30.7%	0.46423	gene22618,gene20160,gene6336,gene19835,gene23442,gene26146,gene24221,gene14764,gene11894,gene19568,gene19578,gene20121,gene25517,gene1744,gene15799
Late stage
cellular_component	GO:0005737 cytoplasm	14 out of 17 genes, 82.4%	6569 out of 13835 genes, 47.5%	0.15699	gene12768,gene20160,gene26258,gene21932,gene5072,gene24221,gene19568,gene19578,gene25517,gene9019,gene2535,gene15532,gene13228,gene17376
molecular_function	GO:0016491 oxidoreductase activity	4 out of 17 genes, 23.5%	557 out of 13835 genes, 4.0%	0.16685	gene12768,gene20160,gene21932,gene24221
biological_process	GO:0070192 chromosome organization involved in meiotic cell cycle	2 out of 17 genes, 11.8%	50 out of 13835 genes, 0.4%	0.19169	gene23730,gene19568
molecular_function	GO:0016614 oxidoreductase activity, acting on CH-OH group of donors	2 out of 17 genes, 11.8%	93 out of 13835 genes, 0.7%	0.23341	gene20160,gene21932
biological_process	GO:0045132 meiotic chromosome segregation	2 out of 17 genes, 11.8%	64 out of 13835 genes, 0.5%	0.31231	gene23730,gene19568
biological_process	GO:0007127 meiosis I	2 out of 17 genes, 11.8%	67 out of 13835 genes, 0.5%	0.34177	gene23730,gene19568
molecular_function	GO:0036094 small molecule binding	6 out of 17 genes, 35.3%	1632 out of 13835 genes, 11.8%	0.42783	gene12768,gene19568,gene22683,gene21932,gene15532,gene17376
cellular_component	GO:0005739 mitochondrion	5 out of 17 genes, 29.4%	1153 out of 13835 genes, 8.3%	0.47489	gene20160,gene19578,gene19568,gene17376,gene13228
molecular_function	GO:0050662 coenzyme binding	2 out of 17 genes, 11.8%	135 out of 13835 genes, 1.0%	0.47881	gene12768,gene21932
